# Supplementary material for: Rosemary supplementation (Rosmarinus oficinallis L.) attenuates cardiac remodeling after myocardial infarction in rats
Source: PubMed Central journal article supplement (PMC5426768; doi:10.1371/journal.pone.0177521), 2017-05-11
Supplement: pone.0177521.s005.pdf [file pone.0177521.s005.pdf]

|                                        | SHAM groups            |                        |                        | Myocardial infarction groups |                            |                           | p values         |        |                   |
|----------------------------------------|------------------------|------------------------|------------------------|------------------------------|----------------------------|---------------------------|------------------|--------|-------------------|
|                                        | SR0                    | SR002                  | SR02                   | IR0                          | IR002                      | IR02                      | p (I)            | p (R)  | p (IxR)           |
| <b>Food intake (g)</b>                 | 25.8±0.2               | 24.6±0.2               | 25.7±0.2               | 25.4±0.2                     | 25.0±0.2                   | 25.5±0.2                  | 0.187            | 0.101  | 0.143             |
| <b>Infarction size (%)</b>             | -                      | -                      | -                      | 41.9±4.5                     | 40.1±4.2                   | 43.6±4.7                  | -                | 0.244  | -                 |
| <b>Weight gain (g)</b>                 | 143±8.2                | 157±8.0                | 148±8.6                | 152±8.8                      | 156±8.8                    | 159±10                    | 0.385            | 0.552  | 0.773             |
| <b>LVDD/BW (mm/kg)</b>                 | 17.9±0.41              | 17.1±0.39              | 17.9±0.29              | 24.6±0.74                    | 24.2±0.68                  | 24.1±0.93                 | <b>&lt;0.001</b> | 0.504  | 0.582             |
| <b>LA/BW (mm/kg)</b>                   | 12.2±0.3 <sup>a</sup>  | 12.2±0.5 <sup>b</sup>  | 12.4±0.4 <sup>c</sup>  | 17.3±0.6 <sup>a,A</sup>      | 15.5±1.0 <sup>b,A,B</sup>  | 19.4±0.9 <sup>c,B</sup>   | <0.001           | 0.030  | <b>0.001*</b>     |
| <b>LA/AO</b>                           | 1.32±0.02 <sup>a</sup> | 1.41±0.04 <sup>b</sup> | 1.38±0.03 <sup>c</sup> | 2.06±0.09 <sup>a,A</sup>     | 1.93±0.14 <sup>b,A,B</sup> | 2.25±0.08 <sup>c,B</sup>  | <0.001           | 0.079  | 0.024*            |
| <b>E wave (cm/s)</b>                   | 75.7±1.5               | 77.2±2.1               | 78.9±1.8               | 98.4±5.5                     | 87.5±8.5                   | 92.7±9.4                  | <b>0.014</b>     | 0.482  | 0.246             |
| <b>Diastolic área (mm<sup>2</sup>)</b> | 44.4±1.6               | 44.5±1.8               | 43.3±1.6               | 92.2±3.9                     | 91.7±6.9                   | 85.2±4.5                  | <b>&lt;0.001</b> | 0.359  | 0.557             |
| <b>FAC (%)</b>                         | 73.3±0.9               | 74.3±1.2               | 75.6±1.0               | 27.0±2.3                     | 28.2±1.5                   | 27.2±3.5                  | <b>&lt;0.001</b> | 0.697  | 0.757             |
| <b>Ejection fraction</b>               | 0.91±0.01              | 0.92±0.01              | 0.93±0.01              | 0.47±0.02                    | 0.49±0.02                  | 0.46±0.02                 | <b>&lt;0.001</b> | 0.571  | 0.612             |
| <b>EDT (ms)</b>                        | 41.7±1.2 <sup>a</sup>  | 44.8±1.9               | 45.3±1.4 <sup>c</sup>  | 36.1±2.5 <sup>a,A</sup>      | 46.4±2.7 <sup>A,B</sup>    | 31.5±2.0 <sup>c,A,B</sup> | 0.001            | 0.002  | <b>0.004*</b>     |
| <b>E/E' ratio</b>                      | 19.1±0.6               | 19.6±0.9               | 18.8±0.6               | 24.4±1.7                     | 25.6±2.8                   | 23.6±2.6                  | <b>&lt;0.001</b> | 0.898  | 0.523             |
| <b>CSA (µm<sup>2</sup>)</b>            | 176±10 <sup>a</sup>    | 155±11 <sup>b</sup>    | 200±11 <sup>c</sup>    | 285±11 <sup>a,A</sup>        | 232±13 <sup>b,A</sup>      | 265±12 <sup>c</sup>       | <0.001           | <0.001 | <b>&lt;0.001*</b> |
| <b>% collagen</b>                      | 3.97±0.4 <sup>a</sup>  | 3.87±0.8               | 3.71±0.3               | 8.73±1.7 <sup>a</sup>        | 5.11±0.4                   | 5.97±0.3                  | 0.046            | 0.553  | <b>0.035</b>      |
