# Supplementary material for: Rosemary supplementation (Rosmarinus oficinallis L.) attenuates cardiac remodeling after myocardial infarction in rats
Source: PubMed Central journal article supplement (PMC5426768; doi:10.1371/journal.pone.0177521), 2017-05-11
Supplement: pone.0177521.s006.pdf [file pone.0177521.s006.pdf]

|                                                  | SHAM groups           |                       |                       | Myocardial infarction groups |                         |                          | p values     |              |                   |
|--------------------------------------------------|-----------------------|-----------------------|-----------------------|------------------------------|-------------------------|--------------------------|--------------|--------------|-------------------|
|                                                  | SR0                   | SR002                 | SR02                  | IR0                          | IR002                   | IR02                     | p (I)        | p (R)        | p (IxR)           |
| <b>LDH activity</b><br>(nmol/mg protein)         | 162±8.0 <sup>a</sup>  | 179±11.8 <sup>b</sup> | 165±8.0               | 192±11.8 <sup>a,A,C</sup>    | 147±9.6 <sup>c,A</sup>  | 151±8.0 <sup>C</sup>     | 0.525        | 0.063        | <b>0.014*</b>     |
| <b>PIDH activity</b><br>(nmol/mg tissue)         | 323±12.9              | 349±17.2              | 342±8.50              | 275±14.3                     | 327±14.9                | 319±4.88                 | <b>0.041</b> | <b>0.062</b> | 0.489             |
| <b>CS activity (nmol/mg tissue)</b>              | 26.1±1.5 <sup>a</sup> | 26.2±1.7 <sup>b</sup> | 26.6±2.3              | 18.3±1.2 <sup>a,A,C</sup>    | 34.8±3.5 <sup>b,A</sup> | 31.2±1.2 <sup>C</sup>    | 0.152        | 0.011        | <b>&lt;0.001*</b> |
| <b>OHADH activity</b><br>(nmol/mg protein)       | 22.9±2.5              | 18.5±2.7 <sup>b</sup> | 16.4±1.7 <sup>c</sup> | 32.2±2.5 <sup>A,C</sup>      | 58.6±6.5 <sup>b,A</sup> | 59.8±7.4 <sup>c,C</sup>  | <0.001       | 0.071        | <b>&lt;0.001*</b> |
| <b>ATP synthase activity</b><br>(nmol/mg tissue) | 24.7±1.9              | 27.8±2.5              | 34.6±3.7              | 26.7±2.1                     | 36.3±3.2                | 38.5±2.8                 | <b>0.039</b> | <b>0.008</b> | 0.569             |
| <b>Complex I activity</b><br>(nmol/mg tissue)    | 3.8±0.2 <sup>a</sup>  | 3.5±0.4 <sup>b</sup>  | 3.8±0.3               | 2.8±0.3 <sup>a,A,C</sup>     | 4.6±0.5 <sup>b,A</sup>  | 4.4±0.2 <sup>C</sup>     | 0.389        | 0.03         | <b>0.004*</b>     |
| <b>Complex II activity</b>                       | 6.0±0.4               | 6.2±0.4               | 5.6±0.5 <sup>c</sup>  | 5.4±0.2 <sup>C</sup>         | 5.5±0.5 <sup>B</sup>    | 8.3±0.5 <sup>c,B,C</sup> | 0.192        | 0.009        | <b>&lt;0.001*</b> |

|                                               |                       |                       |          |                         |                            |                        |        |        |                   |
|-----------------------------------------------|-----------------------|-----------------------|----------|-------------------------|----------------------------|------------------------|--------|--------|-------------------|
| <b>(nmol/mg tissue)</b>                       |                       |                       |          |                         |                            |                        |        |        |                   |
| <b>LH (nmol/mg tissue)</b>                    | 202±10.2 <sup>a</sup> | 233 ±9.8 <sup>b</sup> | 230±10.3 | 331±12.7 <sup>a,C</sup> | 319±9.6 <sup>b,A,B,C</sup> | 235±9.6 <sup>B,C</sup> | <0.001 | <0.001 | <b>&lt;0.001*</b> |
| <b>Catalase activity<br/>(nmol/mg tissue)</b> | 92.4±7.0              | 79.2±12.7             | 92.1±5.6 | 67.3±4.3                | 87.9±5.8                   | 77.5±4.3               | 0.091  | 0.766  | 0.072             |
| <b>SOD activity<br/>(nmol/mg protein)</b>     | 7.1±0.8 <sup>a</sup>  | 8.5±0.7               | 8.5±0.9  | 13±0.6 <sup>a,A,C</sup> | 8.9±0.3 <sup>A</sup>       | 8.7±0.2 <sup>C</sup>   | <0.001 | 0.274  | <b>&lt;0.001*</b> |
| <b>GSH-Px activity<br/>(nmol/mg tissue)</b>   | 34±1.3 <sup>a</sup>   | 29±1.4                | 29±3.0   | 19±0.6 <sup>a</sup>     | 24±3.2                     | 28±3.1                 | <0.001 | 0.712  | <b>0.031*</b>     |
