# Supplementary material for: Rosemary supplementation (Rosmarinus oficinallis L.) attenuates cardiac remodeling after myocardial infarction in rats
Source: PubMed Central journal article supplement (PMC5426768; doi:10.1371/journal.pone.0177521), 2017-05-11
Supplement: pone.0177521.s007.pdf [file pone.0177521.s007.pdf]

|                                                            | SHAM groups |          |          | Myocardial infarction groups |          |          | p values     |       |         |
|------------------------------------------------------------|-------------|----------|----------|------------------------------|----------|----------|--------------|-------|---------|
|                                                            | SR0         | SR002    | SR02     | IR0                          | IR002    | IR02     | p (I)        | p (R) | p (IxR) |
| <b>Nrf-2 expression (arbitrary unit)</b>                   | 1.61±0.1    | 1.23±0.2 | 1.01±0.4 | 0.82±0.8                     | 1.09±0.6 | 0.66±0.5 | <b>0.050</b> | 0.336 | 0.448   |
| <b>HO-1 expression (arbitrary unit)</b>                    | 0.71±0.2    | 0.55±0.2 | 0.52±0.2 | 0.43±0.2                     | 0.47±0.2 | 0.36±0.2 | 0.254        | 0.742 | 0.853   |
| <b>PGC1<math>\alpha</math> expression (arbitrary unit)</b> | 0.55±0.7    | 0.63±0.7 | 0.78±0.5 | 1.17±0.7                     | 0.80±0.4 | 0.84±0.7 | 0.208        | 0.868 | 0.543   |
