# Supplementary material for: Rosemary supplementation (Rosmarinus oficinallis L.) attenuates cardiac remodeling after myocardial infarction in rats
Source: PubMed Central journal article supplement (PMC5426768; doi:10.1371/journal.pone.0177521), 2017-05-11
Supplement: pone.0177521.s008.pdf [file pone.0177521.s008.pdf]

|                                            | SHAM Groups |           |           | Myocardial infarction groups |           |           | p values         |       |         |
|--------------------------------------------|-------------|-----------|-----------|------------------------------|-----------|-----------|------------------|-------|---------|
|                                            | SR0         | SR002     | SR02      | IR0                          | IR002     | IR02      | p (I)            | p (R) | p (IxR) |
| <b>PFK activity (nmol/mg tissue)</b>       | 117±7.8     | 121±7.5   | 115±9.3   | 129±10.9                     | 116±6.8   | 108±4.2   | 0.988            | 0.677 | 0.729   |
| <b>TIMP-1 (pg/mg protein)</b>              | 84.2±10.6   | 98.2±24.7 | 127±31.2  | 113±41.5                     | 70.3±16.0 | 112±3.5   | 0.259            | 0.78  | 0.549   |
| <b>Active MMP-2 (arbitrary unit)</b>       | 13±4.3      | 7.8±3.1   | 13.8±3.7  | 29.1±15.0                    | 9.6±4.6   | 58.6±42.1 | 0.181            | 0.228 | 0.986   |
| <b>Intermediate MMP-2 (arbitrary unit)</b> | 169±23      | 195±12    | 207±8     | 218±11                       | 214±19    | 225±8     | <b>0.032</b>     | 0.360 | 0.504   |
| <b>Total MMP-2 (arbitrary unit)</b>        | 243±52      | 242±19    | 269±15    | 333±45                       | 274±37    | 402±96    | <b>0.033</b>     | 0.266 | 0.572   |
| <b>Active/Total MMP-2</b>                  | 0.05±0.001  | 0.03±0.01 | 0.05±0.01 | 0.07±0.02                    | 0.03±0.01 | 0.10±0.06 | 0.346            | 0.232 | 0.940   |
| <b>IL-10 (pg/mg protein)</b>               | 46.9±4.2    | 45.5±5.9  | 63.9±10.5 | 32.6±5.8                     | 34.2±7.9  | 23.9±2.5  | <b>0.002</b>     | 0.826 | 0.149   |
| <b>ICAM-1 (pg/mg protein)</b>              | 95.7±10.2   | 95.1±7.8  | 115±15.6  | 92.1±1.4                     | 99.3±22.6 | 74.7±11.7 | 0.224            | 0.969 | 0.214   |
| <b>TNF-α (pg/mg protein)</b>               | 41.8±4.2    | 41.2±5.6  | 58.3±10.5 | 26.8±3.1                     | 27.9±5.8  | 18.4±3.5  | <b>&lt;0.001</b> | 0.823 | 0.146   |

|                                                |                 |                 |                 |                 |                 |                 |              |       |       |
|------------------------------------------------|-----------------|-----------------|-----------------|-----------------|-----------------|-----------------|--------------|-------|-------|
| <b>INF-<math>\gamma</math> (pg/mg protein)</b> | 28.9 $\pm$ 2.6  | 27.6 $\pm$ 3.4  | 36.3 $\pm$ 5.9  | 19.8 $\pm$ 3.0  | 20.9 $\pm$ 4.1  | 15.5 $\pm$ 1.8  | <b>0.002</b> | 0.913 | 0.246 |
| <b>Caspase-3 (arbitrary unit)</b>              | 0.47 $\pm$ 0.71 | 0.55 $\pm$ 0.35 | 0.52 $\pm$ 0.12 | 0.71 $\pm$ 0.33 | 0.47 $\pm$ 0.12 | 0.52 $\pm$ 0.22 | 0.254        | 0.742 | 0.853 |
| <b>Bcl-2 (arbitrary unit)</b>                  | 1.30 $\pm$ 0.47 | 0.94 $\pm$ 0.38 | 0.80 $\pm$ 0.24 | 0.65 $\pm$ 0.31 | 0.91 $\pm$ 0.45 | 0.41 $\pm$ 0.22 | <b>0.046</b> | 0.216 | 0.416 |
